# Supplementary material for: Construction of mixed-dimensional WS2/Si heterojunctions for high-performance infrared photodetection and imaging applications
Source: Royal Society of Chemistry journal article supplement (doi:10.1039/d0tc01115k), 2020-01-01
Supplement: d0tc01115k1.pdf [file d0tc01115k1.pdf]

# Construction of mixed-dimensional WS<sub>2</sub>/Si heterojunctions for high-performance infrared photodetection and imaging applications

Zhaoyang Wang,<sup>a</sup> Xiwei Zhang,<sup>b</sup> Di Wu,<sup>\*a</sup> Jiawen Guo,<sup>a</sup> Zihui Zhao,<sup>a</sup> Zhifeng Shi,<sup>a</sup>  
Yongtao Tian,<sup>a</sup> Xiaowen Huang,<sup>\*c</sup> and Xinjian Li<sup>a</sup>

<sup>a</sup>*School of Physics and Microelectronics, and Key Laboratory of Material Physics, Zhengzhou University, Zhengzhou, 450052, P. R. China.*

*E-mail: wudi1205@zzu.edu.cn*

<sup>b</sup>*College of Physics and Electrical Engineering, Anyang Normal University, Anyang, Henan 455000, PR China*

<sup>c</sup>*State Key Laboratory of Biobased Material and Green Papermaking; Department of Bioengineering, Qilu University of Technology (Shandong Academy of Sciences), Jinan 250353, China*

*Email: huangxiaowen2013@gmail.com*

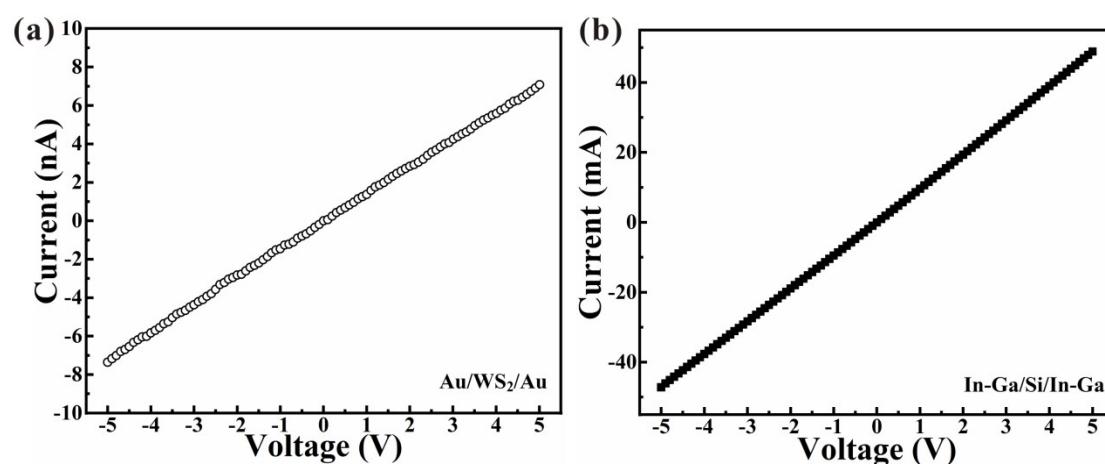

Fig. S1 I-V curves of (a) Au/WS<sub>2</sub>/Au and (b) In-Ga/Si/In-Ga.

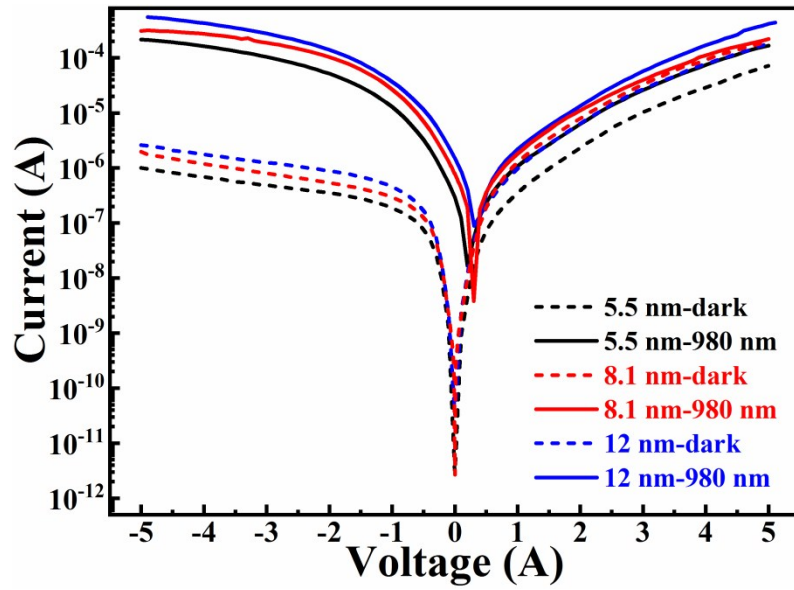

Fig. S2 I-V curves of  $\text{WS}_2/\text{Si}$  heterojunction devices with  $\text{WS}_2$  thickness of 5.5, 8.1 and 12 nm in dark and under 980 nm.

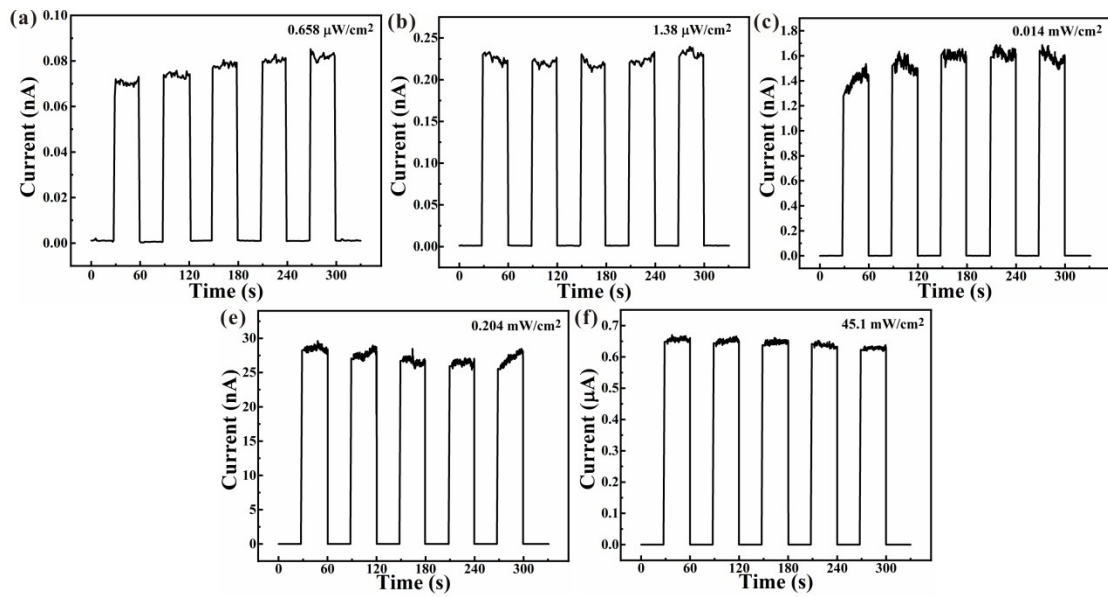

Fig. S3 Time-dependent photoresponse of the  $\text{WS}_2/\text{Si}$  heterojunction under 980 nm light with varying light intensities in linear scale.

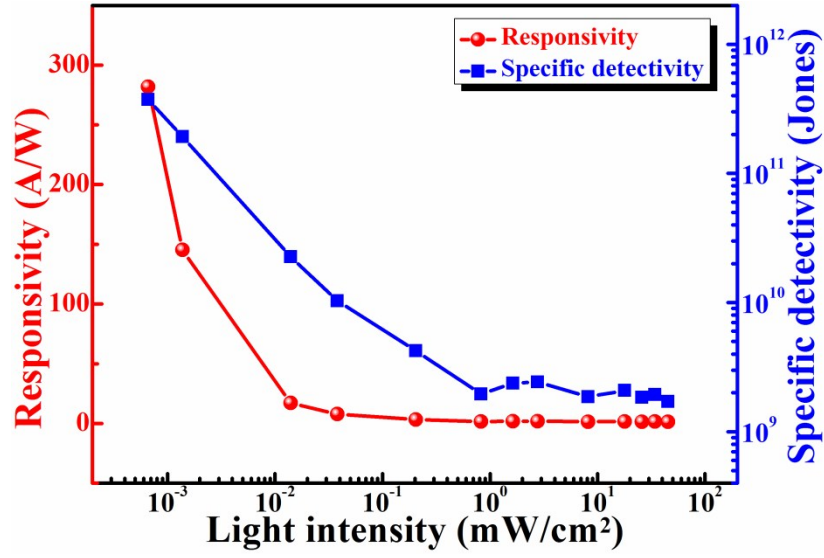

Fig. S4 Responsivity and specific detectivity of the WS<sub>2</sub>/Si heterojunction at a voltage bias of -5 V.

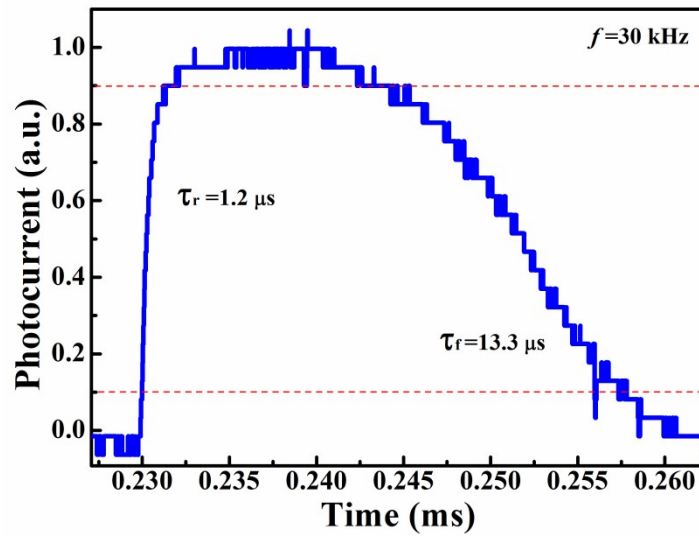

Fig. S5 Response speeds of the WS<sub>2</sub>/Si heterojunction at a frequency of 30 kHz.
